# Supplementary material for: Sequencing of the complete mitochondrial genomes of eight freshwater snail species exposes pervasive paraphyly within the Viviparidae family (Caenogastropoda)
Source: PLoS One. 2017 Jul 25;12(7):e0181699. doi: 10.1371/journal.pone.0181699 (PMC5526530; doi:10.1371/journal.pone.0181699)
Supplement: S1 File — (XLSX) [file pone.0181699.s002.xlsx]

## Sheet: Sheet1
S1 File. Gene tables for eight newly sequenced viviparid mitogenomes.
Margarya monodi									Margarya melanioides									Cipangopaludina chinensis									Cipangopaludina dianchiensis									Cipangopaludina ussuriensis									Bellamya aeruginosa
Gene	Position		Size	Intergenic nucleotides	Codon				Gene	Position		Size	Intergenic nucleotides	Codon				Gene	Position		Size	Intergenic nucleotides	Codon				Gene	Position		Size	Intergenic nucleotides	Codon				Gene	Position		Size	Intergenic nucleotides	Codon				Gene	Position		Size	Intergenic nucleotides
	From	To			Start	Stop	Strand			From	To			Start	Stop	Strand			From	To			Start	Stop	Strand			From	To			Start	Stop	Strand			From	To			Start	Stop	Strand			From	To
NAD2	1	1056	1056		ATG	TAA	+		NAD2	1	1056	1056		ATG	TAA	+		NAD2	15954	17009	1056		ATG	TAA	+		NAD2	1	1056	1056		ATG	TAA	+		NAD2	15541	16596	1056		ATG	TAA	+		NAD2	15958	17013	1056
COX1	1056	2600	1545	-1	ATG	TAA	+		COX1	1056	2591	1536	-1	ATG	TAA	+		COX1	17009	1541	1542	-1	ATG	TAA	+		COX1	1056	2591	1536	-1	ATG	TAA	+		COX1	1	1535	1536		ATG	TAA	+		COX1	17013	1535	1536	-1
COX2	2608	3303	696	7	ATG	TAA	+		COX2	2599	3294	696	7	ATG	TAG	+		COX2	1549	2253	705	1548	ATG	TAG	+		COX2	2599	3294	696	7	ATG	TAG	+		COX2	1539	2231	693	3	ATG	TAG	+		COX2	1539	2231	693	1538
tRNA-Asp	3314	3378	65	10			+		tRNA-Asp	3303	3369	67	8			+		tRNA-Asp	2258	2322	65	4			+		tRNA-Asp	3303	3369	67	8			+		tRNA-Asp	2243	2311	69	11			+		tRNA-Asp	2243	2311	69	11
ATP8	3380	3547	168	1	ATG	TAA	+		ATP8	3371	3538	168	1	ATG	TAA	+		ATP8	2324	2497	174	1	ATG	TAA	+		ATP8	3371	3541	171	1	ATG	TAA	+		ATP8	2314	2475	162	2	ATG	TAA	+		ATP8	2314	2475	162	2
ATP6	3544	4224	681	-4	ATA	TAA	+		ATP6	3535	4254	720	-4	ATA	TAA	+		ATP6	2494	3174	681	-4	ATA	TAA	+		ATP6	3538	4216	679	-4	ATA	T	+		ATP6	2480	3064	585	4	ATG	TAG	+		ATP6	2479	3171	693	3
tRNA-Met	4636	4704	69	411			-		tRNA-Met	4666	4734	69	411			-		tRNA-Met	3583	3651	69	408			-		tRNA-Met	4636	4704	69	419			-		tRNA-Trp	3371	3438	68	306			-		tRNA-Trp	3392	3458	67	220
tRNA-Tyr	4724	4788	65	19			-		tRNA-Tyr	4754	4818	65	19			-		tRNA-Tyr	3671	3735	65	19			-		tRNA-Tyr	4724	4788	65	19			-		tRNA-Gln	3441	3508	68	2			-		tRNA-Gln	3462	3530	69	3
tRNA-Cys	5067	5134	68	278			-		tRNA-Cys	5098	5165	68	279			-		tRNA-Cys	4007	4074	68	271			-		tRNA-Cys	5068	5135	68	279			-		tRNA-Gly	3511	3574	64	2			-		tRNA-Gly	3536	3599	64	5
tRNA-Trp	5159	5225	67	24			-		tRNA-Trp	5190	5257	68	24			-		tRNA-Trp	4099	4166	68	24			-		tRNA-Trp	5160	5227	68	24			-		tRNA-Glu	3593	3661	69	18			-		tRNA-Glu	3644	3710	67	44
tRNA-Gln	5229	5294	66	3			-		tRNA-Gln	5261	5324	64	3			-		tRNA-Gln	4170	4233	64	3			-		tRNA-Gln	5231	5294	64	3			-		tRNA-Met	3909	3973	65	247			-		tRNA-Met	4474	4539	66	763
tRNA-Gly	5300	5366	67	5			-		tRNA-Gly	5330	5396	67	5			-		tRNA-Gly	4239	4303	65	5			-		tRNA-Gly	5300	5366	67	5			-		tRNA-Tyr	3987	4056	70	13			-		tRNA-Tyr	4559	4626	68	19
tRNA-Glu	5427	5491	65	60			-		tRNA-Glu	5461	5525	65	64			-		tRNA-Glu	4360	4424	65	56			-		tRNA-Glu	5425	5489	65	58			-		tRNA-Cys	4239	4304	66	182			-		tRNA-Cys	4693	4763	71	66
12S	5557	6453	897	65			+		12S	5591	6486	896	65			+		12S	4491	5381	891	66			+		12S	5555	6451	897	65			+		12S	4493	5305	813	188			+		12S	4971	5789	819	207
tRNA-Val	6448	6516	69	-6			+		tRNA-Val	6481	6549	69	-6			+		tRNA-Val	5376	5446	71	-6			+		tRNA-Val	6446	6515	70	-6			+		tRNA-Val	5301	5369	69	-5			+		tRNA-Val	5785	5853	69	-5
16S	6493	7873	1381	-24			+		16S	6526	7904	1379	-24			+		16S	5440	6815	1376	-7			+		16S	6491	7872	1382	-25			+		16S	5366	6766	1401	-4			+		16S	5851	7248	1398	-3
tRNA-Leu	7919	7983	65	45			+		tRNA-Leu	7947	8011	65	42			+		tRNA-Leu2	6866	6931	66	50			+		tRNA-Leu	7914	7978	65	41			+		tRNA-Leu2	6810	6879	70	43			+		tRNA-Leu2	7289	7359	71	40
tRNA-Leu	8054	8123	70	70			+		tRNA-Leu	8077	8146	70	65			+		tRNA-Leu1	7023	7082	60	91			+		tRNA-Leu	8044	8113	70	65			+		tRNA-Leu1	7080	7151	72	200			+		tRNA-Leu1	7458	7530	73	98
NAD1	8124	9065	942		ATG	TAG	+		NAD1	8147	9088	942		ATG	TAA	+		NAD1	7084	8025	942	1	ATG	TAA	+		NAD1	8114	9055	942		ATG	TAA	+		NAD1	7153	8094	942	1	ATG	TAA	+		NAD1	7532	8473	942	1
tRNA-Pro	9067	9133	67	1			+		tRNA-Pro	9090	9155	66	1			+		tRNA-Pro	8027	8094	68	1			+		tRNA-Pro	9057	9123	67	1			+		tRNA-Pro	8096	8165	70	1			+		tRNA-Pro	8475	8541	67	1
NAD6	9138	9638	501	4	ATG	TAA	+		NAD6	9159	9659	501	3	ATG	TAA	+		NAD6	8098	8598	501	3	ATG	TAA	+		NAD6	9127	9627	501	3	ATG	TAA	+		NAD6	8168	8668	501	2	ATG	TAA	+		NAD6	8545	9045	501	3
CYTB	9671	10810	1140	32	ATG	TAG	+		CYTB	9693	10832	1140	33	ATG	TAG	+		CYTB	8619	9752	1134	20	ATG	TAG	+		CYTB	9660	10799	1140	32	ATG	TAG	+		CYTB	8708	9841	1134	39	ATG	TAA	+		CYTB	9093	10235	1143	47
tRNA-Ser	10824	10889	66	13			+		tRNA-Ser	10847	10912	66	14			+		tRNA-Ser2	9764	9829	66	11			+		tRNA-Ser	10813	10878	66	13			+		tRNA-Ser2	9842	9907	66				+		tRNA-Ser2	10233	10304	72	-3
NAD4L	10912	11208	297	22	ATG	TAG	+		NAD4L	10937	11233	297	24	ATG	TAG	+		NAD4L	9858	10154	297	28	ATG	TAG	+		NAD4L	10903	11199	297	24	ATG	TAG	+		NAD4L	9934	10227	294	26	ATG	TAA	+		NAD4L	10331	10624	294	26
NAD4	11220	12572	1353	11	TTG	TAA	+		NAD4	11245	12597	1353	11	TTG	TAG	+		NAD4	10166	11518	1353	11	TTG	TAA	+		NAD4	11211	12563	1353	11	TTG	TAA	+		NAD4	10221	11597	1377	-7	ATG	TAG	+		NAD4	10609	11994	1386	-16
tRNA-His	12573	12635	63				+		tRNA-His	12598	12660	63				+		tRNA-His	11519	11580	62				+		tRNA-His	12564	12626	63				+		tRNA-His	11598	11659	62				+		tRNA-His	11995	12062	68
NAD5	12637	14352	1716	1	ATG	TAG	+		NAD5	12662	14377	1716	1	ATG	TAA	+		NAD5	11582	13297	1716	1	ATG	TAG	+		NAD5	12628	14343	1716	1	ATG	TAG	+		NAD5	11661	13379	1719	1	ATG	TAA	+		NAD5	12064	13779	1716	1
tRNA-Thr	14689	14757	69	336			+		tRNA-Thr	14850	14916	67	472			+		tRNA-Thr	13615	13683	69	317			+		tRNA-Thr	14671	14737	67	327			+		tRNA-Phe	13379	13445	67	-1			+		tRNA-Phe	13780	13846	67
tRNA-Phe	15057	15121	65	299			+		tRNA-Phe	15092	15156	65	175			+		tRNA-Phe	13977	14041	65	293			+		tRNA-Phe	15053	15117	65	315			+		tRNA-Thr	13742	13812	71	296			+		tRNA-Thr	14132	14201	70	285
COX3	15478	16257	780	356	ATG	TAA	+		COX3	15510	16289	780	353	ATG	TAA	+		COX3	14379	15158	780	337	ATG	TAA	+		COX3	15471	16250	780	353	ATG	TAA	+		COX3	13895	14671	777	82	ATG	TAA	+		COX3	14273	15052	780	71
tRNA-Lys	16275	16345	71	17			+		tRNA-Lys	16307	16377	71	17			+		tRNA-Lys	15176	15246	71	17			+		tRNA-Lys	16268	16338	71	17			+		tRNA-Lys	14690	14758	69	18			+		tRNA-Lys	15071	15138	68	18
tRNA-Ala	16346	16412	67				+		tRNA-Ala	16379	16441	63	1			+		tRNA-Ala	15258	15313	56	11			+		tRNA-Ala	16340	16402	63	1			+		tRNA-Ala	14815	14881	67	56			+		tRNA-Ala	15226	15283	58	87
tRNA-Arg	16413	16485	73				+		tRNA-Arg	16444	16516	73	2			+		tRNA-Arg	15316	15388	73	2			+		tRNA-Arg	16405	16477	73	2			+		tRNA-Arg	14886	14955	70	4			+		tRNA-Arg	15292	15362	71	8
tRNA-Asn	16487	16556	70	1			+		tRNA-Asn	16518	16587	70	1			+		tRNA-Asn	15389	15459	71				+		tRNA-Asn	16479	16548	70	1			+		tRNA-Asn	14962	15034	73	6			+		tRNA-Asn	15368	15440	73	5
tRNA-Ile	16561	16630	70	4			+		tRNA-Ile	16593	16662	70	5			+		tRNA-Ile	15464	15533	70	4			+		tRNA-Ile	16554	16623	70	5			+		tRNA-Ile	15046	15115	70	11			+		tRNA-Ile	15462	15531	70	21
NAD3	16631	16984	354		ATG	TAG	+		NAD3	16663	17016	354		ATG	TAG	+		NAD3	15534	15887	354		ATG	TAG	+		NAD3	16624	16977	354		ATG	TAG	+		NAD3	15117	15470	354	1	ATG	TAA	+		NAD3	15532	15885	354
tRNA-Ser	16983	17051	69	-2			+		tRNA-Ser	17015	17083	69	-2			+		tRNA-Ser1	15886	15953	68	-2			+		tRNA-Ser	16976	17044	69	-2			+		tRNA-Ser1	15472	15540	69	1			+		tRNA-Ser1	15889	15957	69	3
Overlap:	5	gap:	26								Overlap:	5	gap:	28				Overlap:	4	gap:	28						Overlap:	5	gap:	28						Overlap:	4	gap:	30						Overlap:	4	gap:	29
[truncated: 19 more columns]
